# Supplementary material for: The lncRNA H19 promotes epithelial to mesenchymal transition by functioning as miRNA sponges in colorectal cancer
Source: PubMed Central journal article supplement (PMC4673179; doi:10.18632/oncotarget.4154), 2015-06-05
Supplement: oncotarget-06-22513-s001.pdf [file oncotarget-06-22513-s001.pdf]

## SUPPLEMENTARY FIGURES, AND TABLE

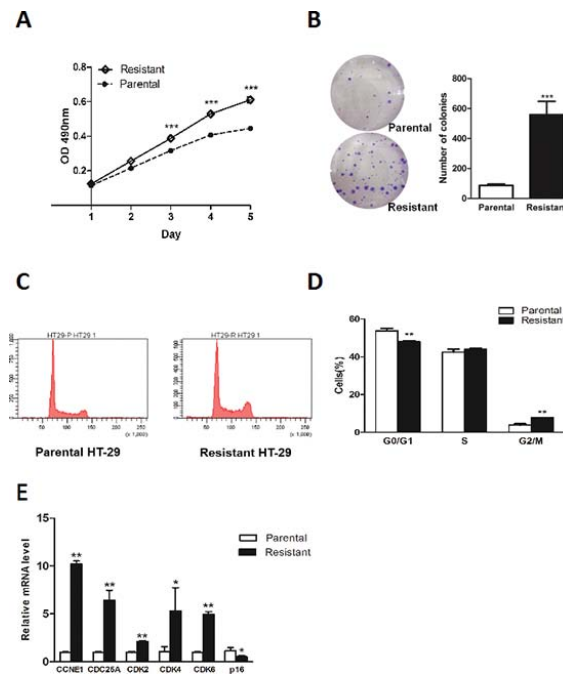

**Supplementary Figure S1: Methotrexate resistant HT-29 cells displayed enhanced cell growth.** **A.** Equal numbers of parental and resistant cells were seeded into 96 well plate. Methotrexate resistant HT-29 cells displayed increased cell proliferation. **B.**  $1 \times 10^3$  parental and resistant HT-29 cells were seeded into 6 well plate and cultured for 12 days. The cell colonies were visualized by crystal violet and counted. Increased numbers of colonies were found in resistant cells. **C&D.** Flow cytometry was utilized to evaluate the difference in cell cycle progression between parental and resistant cells. Decreased G0/G1 phase and increase G2/M phase were observed in resistant cells. **E.** Several G1/S phase transition marker genes were monitored by RT-PCR. \* $P < 0.05$ ; \*\* $P < 0.01$ ; \*\*\* $P < 0.001$ .

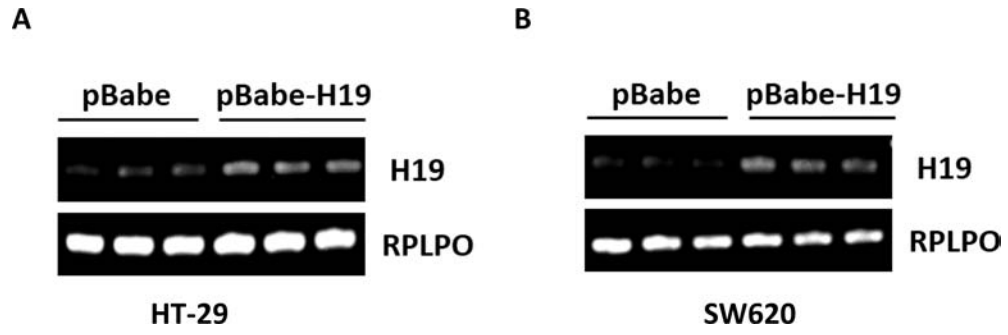

**Supplementary Figure S2: Relative RNA level of H19 was monitored by semi-quantitative RT-PCR.** Upregulation of H19 was observed in both HT-29 cells **A.** and SW620 cells **B.**

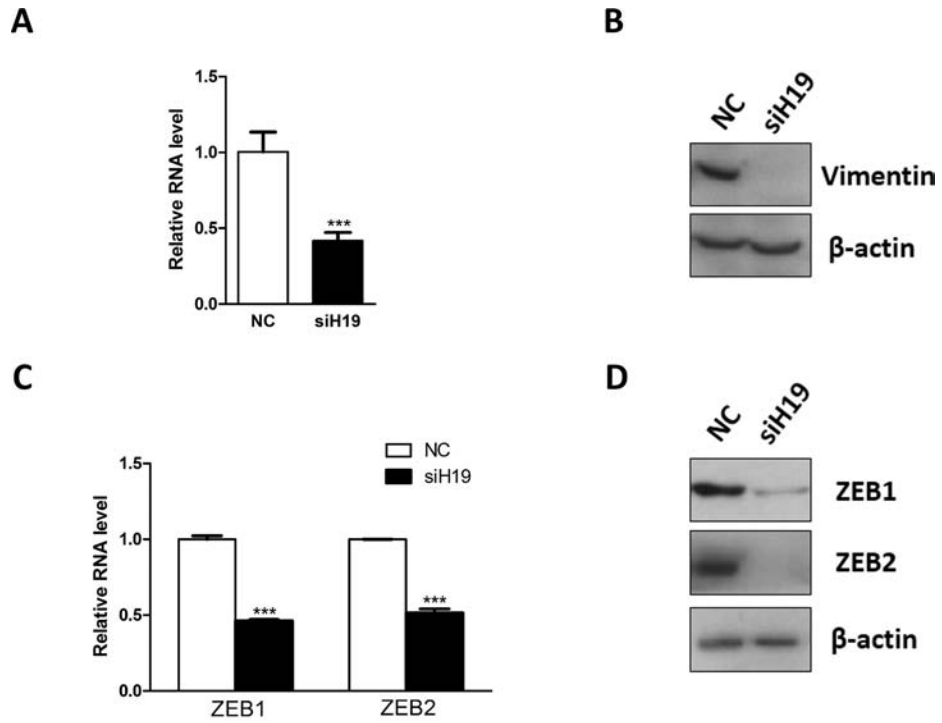

**Supplementary Figure S3: The expression patterns of Vimentin, ZEB1 and ZEB2 were examined after downregulation of H19 by siRNA. Reduction of H19 triggered downregulation of Vimentin A&B. ZEB1 and ZEB2 C&D.**

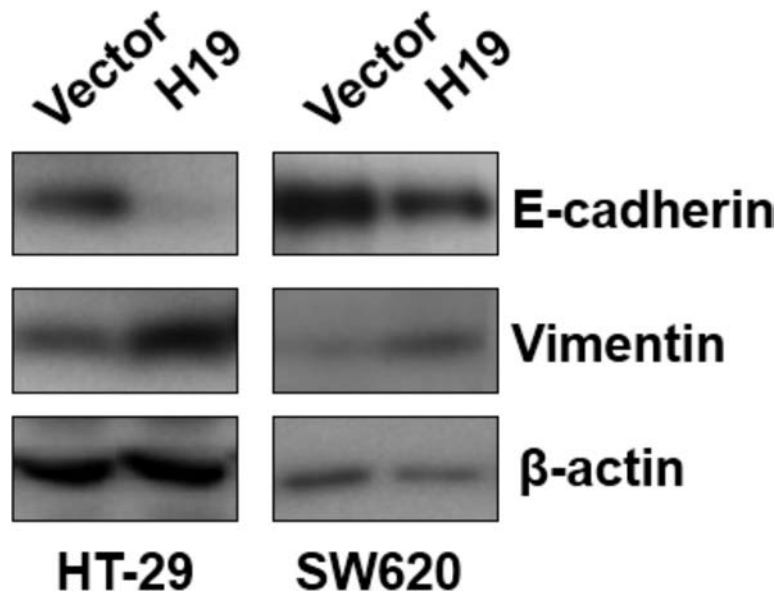

**Supplementary Figure S4** The expression profiles of E-cadherin and Vimentin in tumor samples were examined. Stable expression of H19 increased the expression of Vimentin and decreased the expression of E-cadherin.

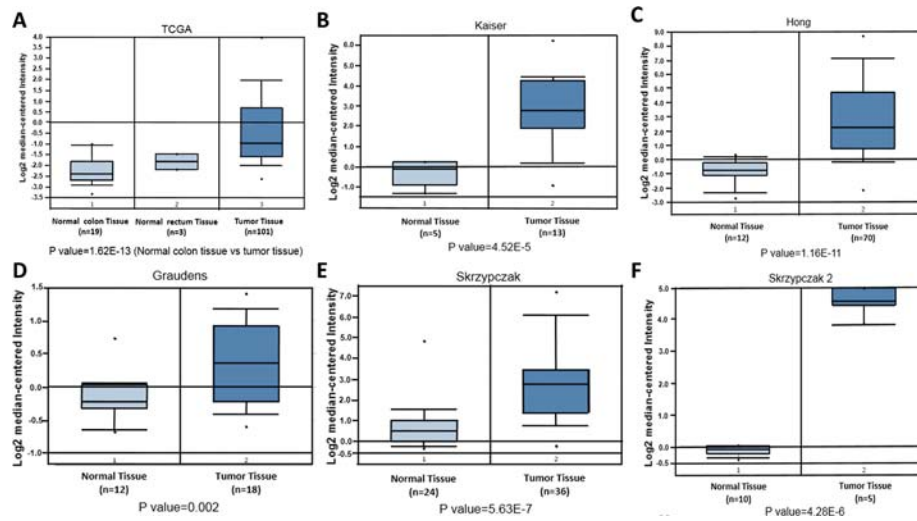

**Supplementary Figure S5: Expression profile of H19 in CRC specimens from online public database Oncomine. A–F.** Increased expression of H19 in tumor tissues was identified by six independent studies on human colorectal cancers. Data and statistics analysis were obtained from website <http://www.oncomine.org>.

**Supplementary Table S1. Primer sequences used in this study.**

| Name          | Primer sequences used for plasmid construction |
|---------------|------------------------------------------------|
| H19-luc-F     | AGCAGTTTAAACGGGAGGGGGTGGGATGGGT                |
| H19-luc-R     | GCTCTAGAGCTGTAACAGTGTTTATTG                    |
| pBabeH19-F    | CGCGGATCCGGGAGGGGGTGGGATGGGT                   |
| pBabeH19-R    | ACGCGTCGACGCTGTAACAGTGTTTATTG                  |
| VIM-CDS-luc-F | AGCAGTTTAAACCCCTCCTACCGCAGGATGTT               |
| VIM-CDS-luc-R | GCTCTAGAGATGTCCTCGGCCAGGTT                     |
| Name          | Primer sequences used for RT-PCR               |
| CUDR_F        | GCACCCTAGACCCGAAA                              |
| CUDR_R        | GCCACCTGGACGGATAT                              |
| TINCR_F       | TGTGGCCAAACTCAGGGATACAT                        |
| TINCR_R       | AGATGACAGTGGCTGGAGTTGTCA                       |
| ST8SIA3_F     | AGGAAGCCTGAGAGTTGGC                            |
| ST8SIA3_R     | CTCAGTGGGGAAGACTCCAG                           |
| Linc_MD1_F    | CACTGCCAGCTCTGGAAAAT                           |
| Linc_MD1_R    | ACTTGGTTCGTTTGACCAG                            |
| H19-F         | TGCTGCACTTTACAACCACTG                          |
| H19-R         | ATGGTGTCTTTGATGTTGGGC                          |
| RPLPO_F       | CCGGATATGAGGCAGCAGTT                           |
| RPLPO_R       | GAAGGCTGTGGTGCTGATGG                           |
| Vimentin-F    | GACGCCATCAACACCGAGTT                           |
| Vimentin-R    | CTTTGTCTGTTGGTTAGCTGGT                         |
| E-cadherin_F  | CGAGAGCTACACGTTACGG                            |
| E-cadherin_R  | GGGTGTCGAGGGAAAAATAGG                          |
| ZEB1_F        | ATCATCGCTACTCCTACTG                            |
| ZEB1_R        | TCTTCCCTTGTCAAACTC                             |
| ZEB2_F        | CAAGAGGCGCAAACAAGCC                            |
| ZEB2_R        | GGTTGGCAATACCGTCATCC                           |
| CDK2_F        | ATGGAGAACTTCCAAAAGGTGGA                        |
| CDK2_R        | CAGGCGGATTTTCTTAAGCG                           |
| CDK4_F        | TTGCATCGTTCACCGAGATC                           |
| CDK4_R        | CTGGTAGCTGTAGATTCTGGCCA                        |
| CDK6_F        | TGCACAGTGTACGAACAGA                            |
| CDK6_R        | ACCTCGGAGAAGCTGAAACA                           |

(Continued)

|             |                         |
|-------------|-------------------------|
| Cyclin E1_F | CAGATTGCAGAGCTGTTGGA    |
| Cyclin E1_R | TCCCCGTCTCCCTTATAACC    |
| p16_F       | ATGGAGCCTTCGGCTGACT     |
| p16_R       | GTA ACTATTCGGTGCGTTGGG  |
| CDC25A_F    | ACAGCTCCTCTCGTCATGAGAAC |
| CDC25A_R    | GGTCTCTTCAACTGACCGAGT   |
| DHFR_F      | ATCGGCAAGAACGGGGA       |
| DHFR_R      | TCTGGAAAGAAAATGAGC      |
| U6          | CTCGCTTCGGCAGCACA       |
| miR-200a-3p | TAACACTGTCTGGTAACGATGT  |
| miR-138-5p  | AGCTGGTGTGTGAATCAGGCCG  |
